# Supplementary material for: Deferasirox HOF and its in situ metallization affording a new family of lanthanide coordination polymer-based MHOFs
Source: Royal Society of Chemistry journal article supplement (doi:10.1039/d4ce01245c), 2025-01-01
Supplement: d4ce01245c1.pdf [file d4ce01245c1.pdf]

## *Supporting Information*

Table S1. Selected hydrogen bond geometries for compounds **DFX**, **DFX-Ce** and **DFX-Eu**.

|               | D–H      | A                     | d(D⋯A) / Å | d(H⋯A) / Å | <DHA / deg |
|---------------|----------|-----------------------|------------|------------|------------|
| <b>DFX</b>    | O1-H1    | O2 [-x+1, -y+1, -z-1] | 2.673      | 1.855      | 175.51     |
|               | O3-H3    | N3 [x, -y+3/2, z-1/2] | 2.800      | 2.007      | 162.78     |
|               | O4-H4    | N2                    | 2.690      | 1.970      | 146.09     |
| <b>DFX-Ce</b> | O3-H3    | N2                    | 2.642      | 1.920      | 146.33     |
|               | O4-H4    | N3                    | 2.638      | 1.912      | 146.95     |
|               | O7-H7    | N5                    | 2.629      | 1.901      | 147.45     |
|               | O8-H8    | N6                    | 2.618      | 1.911      | 143.71     |
|               | O11-H11  | N8                    | 2.657      | 1.931      | 147.10     |
|               | O12-H12  | N9                    | 2.638      | 1.905      | 148.21     |
|               | O15-H15  | N11                   | 2.633      | 1.918      | 145.21     |
|               | O16-H16  | N12                   | 2.610      | 1.942      | 138.13     |
|               | O19-H19  | N14                   | 2.637      | 1.906      | 147.94     |
|               | O20-H20  | N15                   | 2.619      | 1.893      | 146.95     |
|               | O23-H23  | N17                   | 2.667      | 1.958      | 144.15     |
|               | O24-H24  | N18                   | 2.695      | 1.969      | 147.22     |
|               | O25-H25A | O17                   | 2.745      | 2.263      | 117.41     |
|               | O25-H25B | O1 [-x+1, -y+1, -z+1] | 2.824      | 2.429      | 112.12     |
| <b>DFX-Eu</b> | O3-H3    | N3                    | 2.634      | 1.907      | 147.22     |
|               | O4-H4    | N2                    | 2.642      | 1.916      | 146.98     |
|               | O7-H7    | N6                    | 2.597      | 1.866      | 147.84     |
|               | O8-H8    | N5                    | 2.632      | 1.903      | 147.43     |
|               | O11-H11  | N8                    | 2.638      | 1.911      | 147.09     |
|               | O12-H12  | N9                    | 2.606      | 1.904      | 143.04     |
|               | O15-H15  | N12                   | 2.642      | 1.914      | 147.52     |
|               | O16-H16  | N11                   | 2.657      | 1.933      | 146.69     |
|               | O19-H19  | O11 [-x+1, -y+1, -z]  | 2.878      | 2.485      | 110.69     |
|               | O19-H19  | N14                   | 2.651      | 1.922      | 147.48     |
|               | O20-H20  | N15                   | 2.612      | 1.884      | 147.31     |
|               | O23-H23  | N17                   | 2.663      | 1.946      | 145.50     |
|               | O24-H24  | N18                   | 2.689      | 1.965      | 146.71     |
|               | O25-H25B | O2                    | 2.815      | 2.432      | 113.19     |

Table S2. Selected hydrogen bond geometries for compounds **DFX-Gd** and **DFX-Tb**.

|               | D-H                    | A                      | d(D···A) / Å | d(H···A) / Å | <DHA / deg |
|---------------|------------------------|------------------------|--------------|--------------|------------|
| <b>DFX-Gd</b> | O3-H3                  | O15 [x, y-1, z]        | 2.802        | 2.394        | 111.63     |
|               | O3-H3                  | N2                     | 2.672        | 1.967        | 143.66     |
|               | O4-H4                  | N3                     | 2.686        | 1.971        | 145.34     |
|               | O7-H7                  | O11 [x, y, z-1]        | 2.872        | 2.450        | 112.99     |
|               | O7-H7                  | N5                     | 2.656        | 1.932        | 146.83     |
|               | O8-H8                  | N6                     | 2.612        | 1.893        | 145.86     |
|               | O11-H11                | N8                     | 2.637        | 1.918        | 145.85     |
|               | O12-H12                | N9                     | 2.599        | 1.858        | 149.57     |
|               | O15-H15                | N11                    | 2.654        | 1.935        | 145.87     |
|               | O16-H16                | N12                    | 2.646        | 1.930        | 145.44     |
|               | O19-H19                | N14                    | 2.627        | 1.899        | 147.41     |
|               | O20-H20                | N15                    | 2.587        | 1.852        | 148.65     |
|               | O23-H23                | O23 [-x+1, -y+2, -z+1] | 2.901        | 2.489        | 112.37     |
|               | O23-H23                | N17                    | 2.640        | 1.926        | 145.03     |
|               | O24-H24                | N18                    | 2.628        | 1.903        | 146.79     |
|               | O25-H25B               | O6                     | 2.764        | 2.225        | 126.96     |
| <b>DFX-Tb</b> | O3-H3                  | N21                    | 2.666        | 1.940        | 147.10     |
|               | O4-H4                  | N19                    | 2.708        | 1.981        | 147.46     |
|               | O7-H7                  | N2                     | 2.646        | 1.920        | 147.02     |
|               | O8-H8                  | N3                     | 2.609        | 1.878        | 147.86     |
|               | O11-H11                | N23                    | 2.626        | 1.895        | 147.75     |
|               | O12-H12                | N22                    | 2.628        | 1.889        | 149.36     |
|               | O15-H15                | N6                     | 2.664        | 1.934        | 147.84     |
|               | O16-H16                | N5                     | 2.650        | 1.925        | 146.87     |
|               | O19-H19                | N28                    | 2.617        | 1.891        | 147.08     |
|               | O20-H20                | N30                    | 2.616        | 1.880        | 148.73     |
|               | O23-H23                | N7                     | 2.634        | 1.905        | 147.59     |
|               | O24-H24                | N9                     | 2.602        | 1.877        | 146.89     |
|               | O27-H27                | N11                    | 2.635        | 1.906        | 147.58     |
|               | O28-H28                | N12                    | 2.659        | 1.930        | 147.67     |
|               | O31-H31                | N34                    | 2.663        | 1.936        | 147.28     |
|               | O32-H32                | N35                    | 2.666        | 1.944        | 146.46     |
|               | O35-H35                | N15                    | 2.634        | 1.901        | 148.38     |
|               | O36-H36                | N14                    | 2.607        | 1.875        | 148.05     |
|               | O39-H39                | N32                    | 2.627        | 1.901        | 146.98     |
|               | O40-H40                | N33                    | 2.628        | 1.887        | 149.67     |
|               | O43-H43                | N17                    | 2.639        | 1.919        | 145.97     |
|               | O44-H44                | N18                    | 2.656        | 1.925        | 147.93     |
|               | O47-H47                | N25                    | 2.637        | 1.905        | 148.14     |
|               | O48-H48                | N26                    | 2.639        | 1.904        | 148.71     |
|               | O51-H51A               | O38 [-x+1, -y+1, -z+1] | 2.750        | 2.062        | 137.57     |
| O51-H51B      | O42 [-x+1, -y+1, -z+1] | 3.023                  | 2.278        | 146.43       |            |

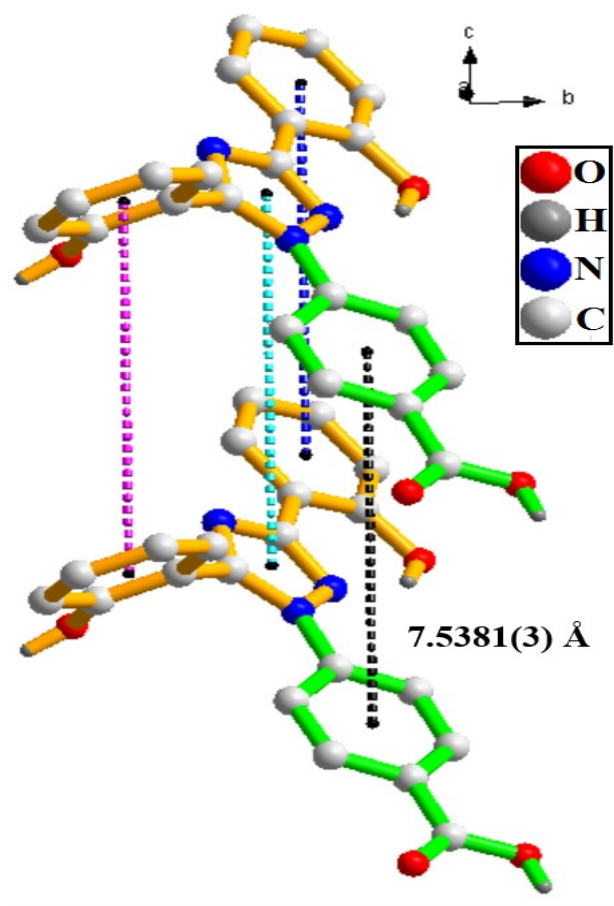

Figure S1. Perspective view of a slip-stack orientation in **DFX** stabilized by some  $\pi \cdots \pi$  packing interactions between two adjacent phenyl rings or triazole rings with the distance of 7.5381 (3) Å.

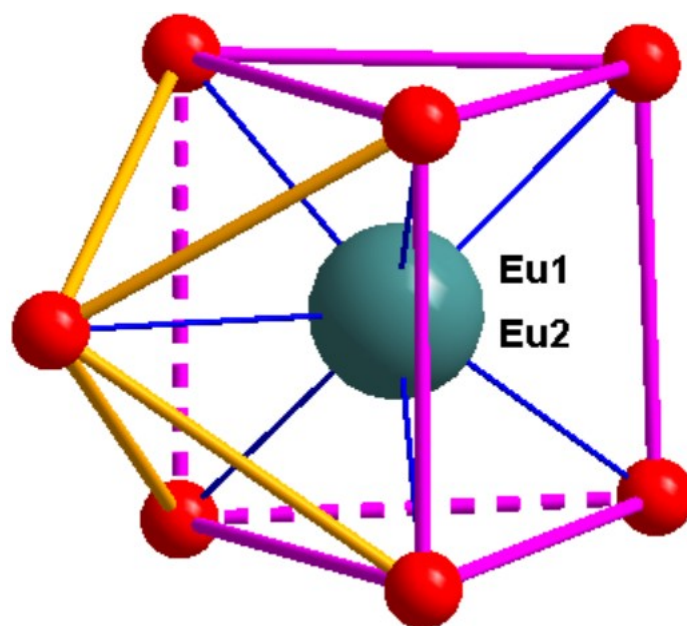

Figure S2. The distorted monocapped trigonal-prismatic coordination polyhedron in **DFX-Eu**.

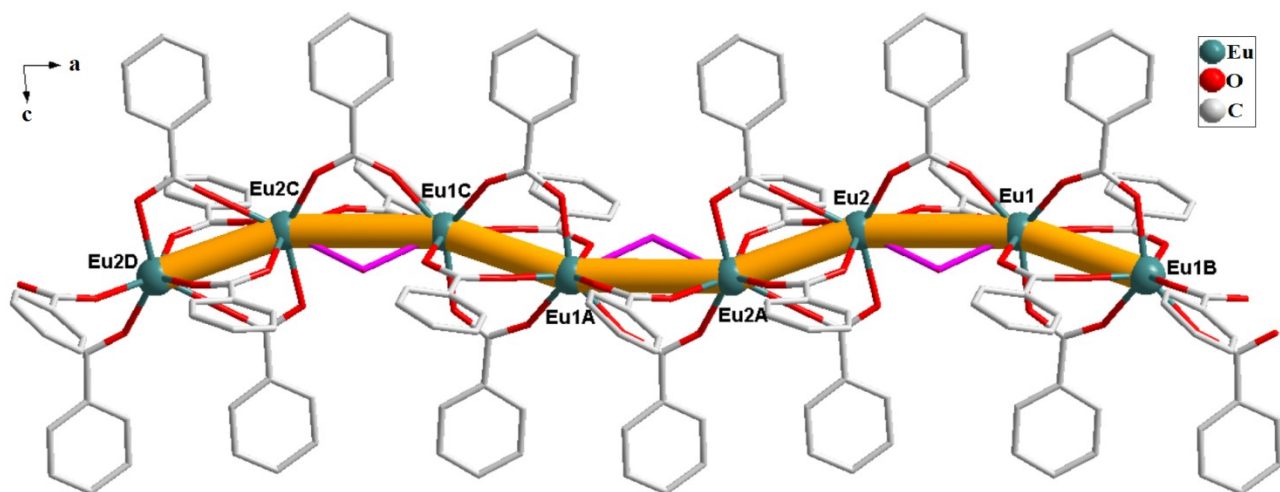

Figure S3. Formation of the cruciform-like 1D coordination polymer chain running along the  $a$  axis in **DFX-Eu**. Eu-Eu vectors are highlighted in yellow for emphasising the undulation direction of the chain. Symmetry codes: A ( $1-x, 1-y, 1-z$ ), B ( $2-x, 1-y, 1-z$ ), C ( $-1+x, y, z$ ), D ( $-x, 1-y, 1-z$ ).

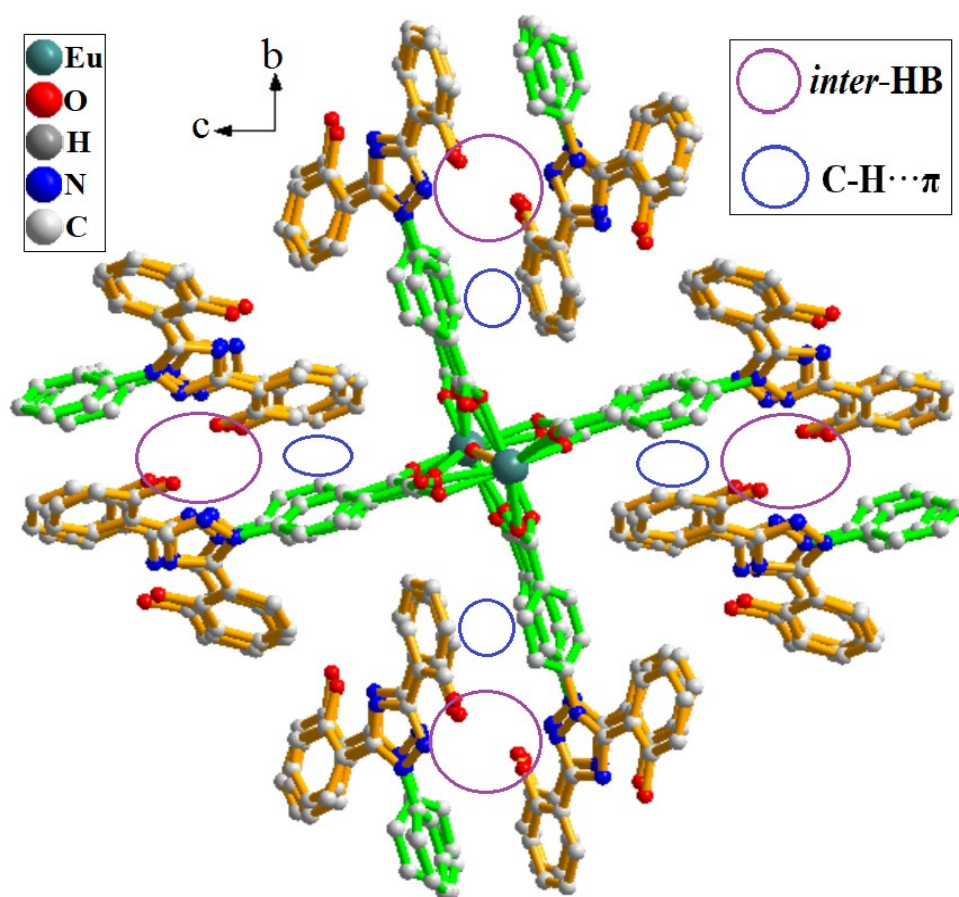

Figure S4. The local magnification diagram for the 3D supramolecular architecture of **DFX-Eu**.

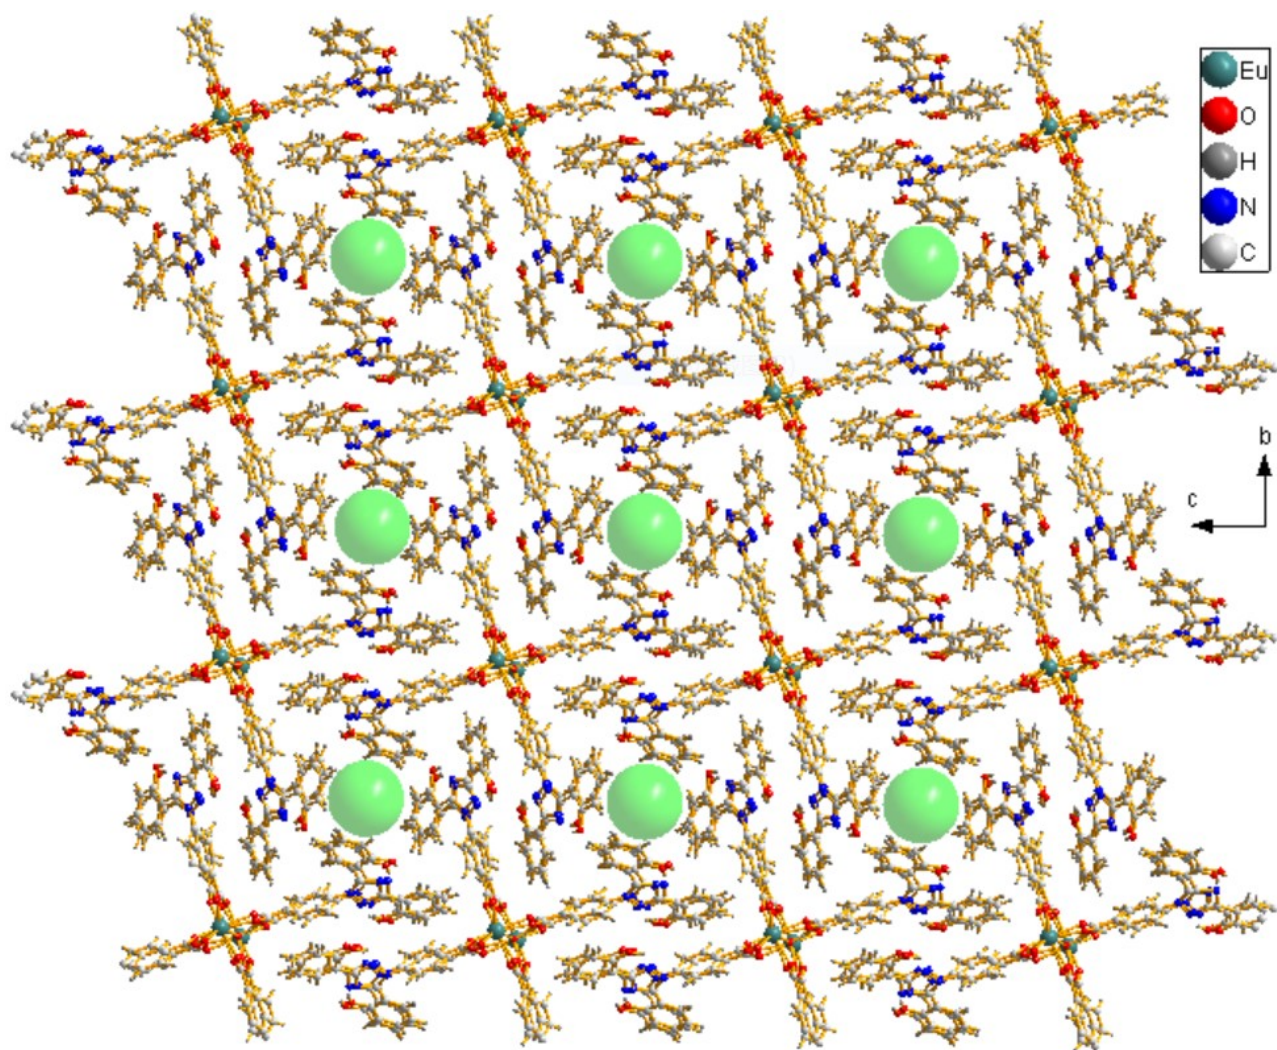

Figure S5. The 3D supramolecular architecture with tube and labyrinth-like micro-voids for **DFX-Eu** (tubular shaped-voids are highlighted with the pale green spheres).

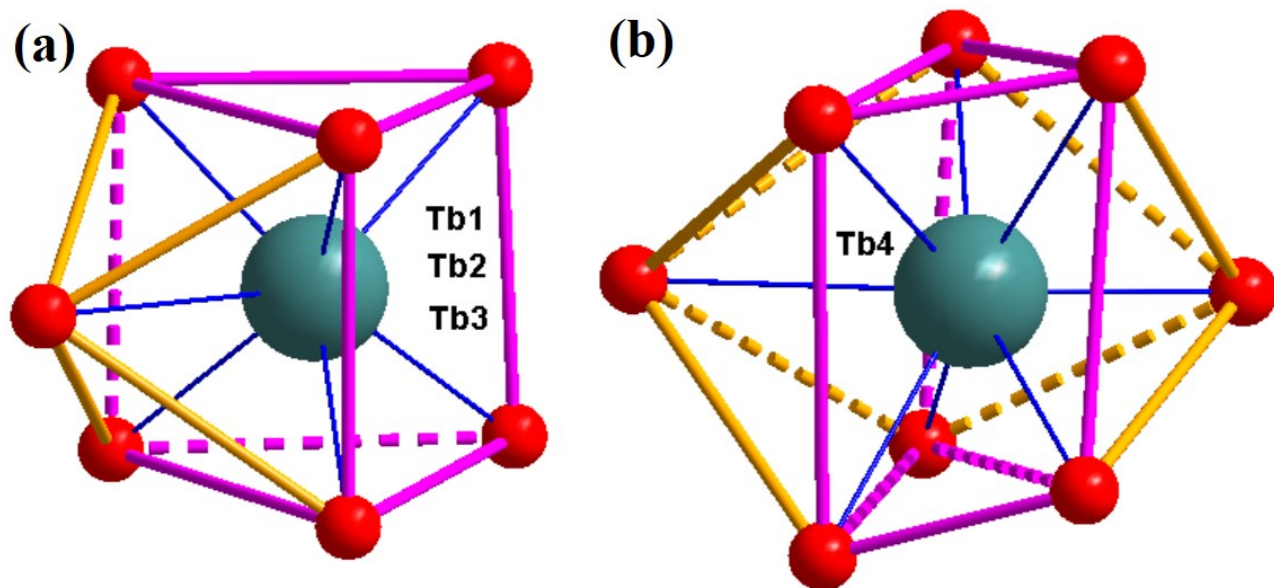

Figure S6. (a) The distorted monocapped trigonal-prismatic coordination polyhedron in **DFX-Tb**; (b) the distorted bicapped trigonal-prismatic coordination polyhedron in **DFX-Tb**.

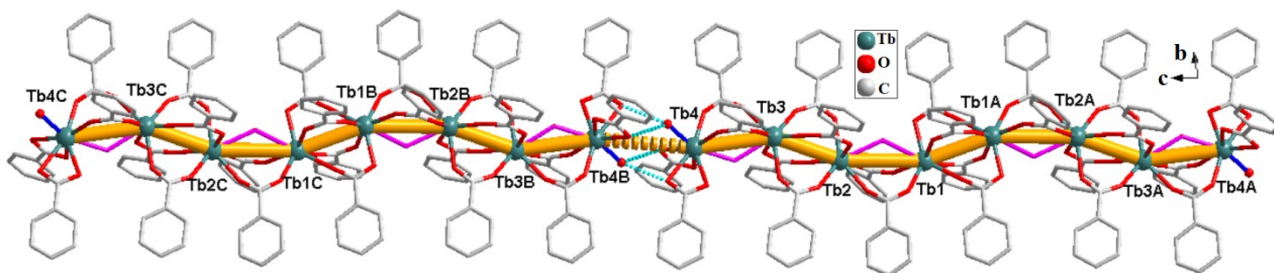

Figure S7. The local magnification diagram for the cruciform-like 1D coordination polymer chain self-healed by intrachain hydrogen bonds along the *a* axis in **DFX-Tb**. Tb-Tb vectors are highlighted in yellow for emphasising the undulation direction of the chain. Symmetry codes: A (1-x, 1-y, 1-z), B (1-x, 1-y, -z), C (x, y, 1+z).

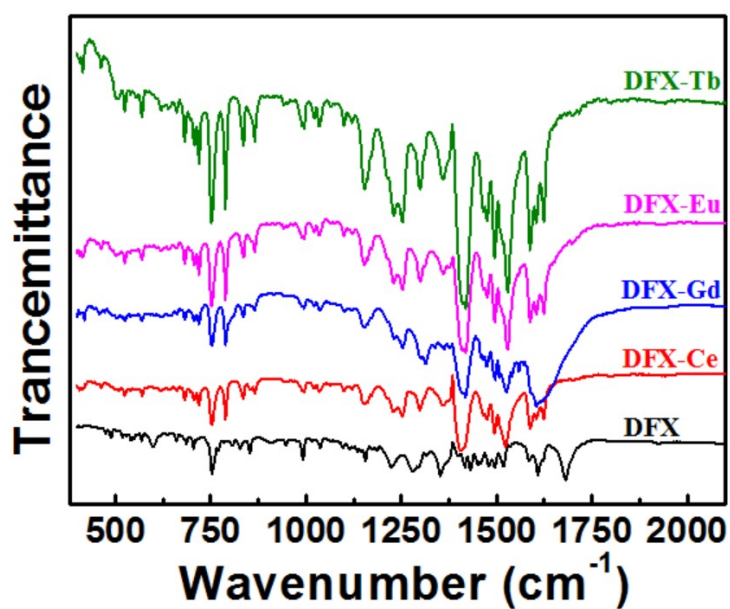

Figure S8. FT-IR spectra for **DFX**, **DFX-Ce**, **DFX-Gd**, **DFX-Eu** and **DFX-Tb**.

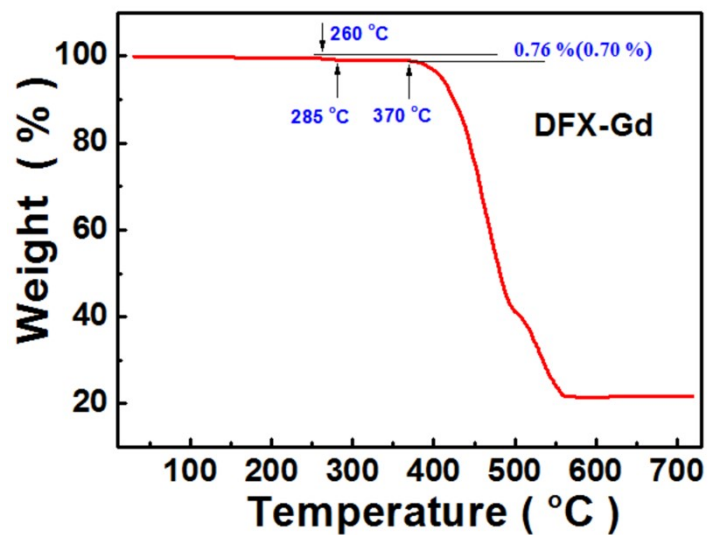

Figure S9. TG curve of compound **DFX-Gd**.

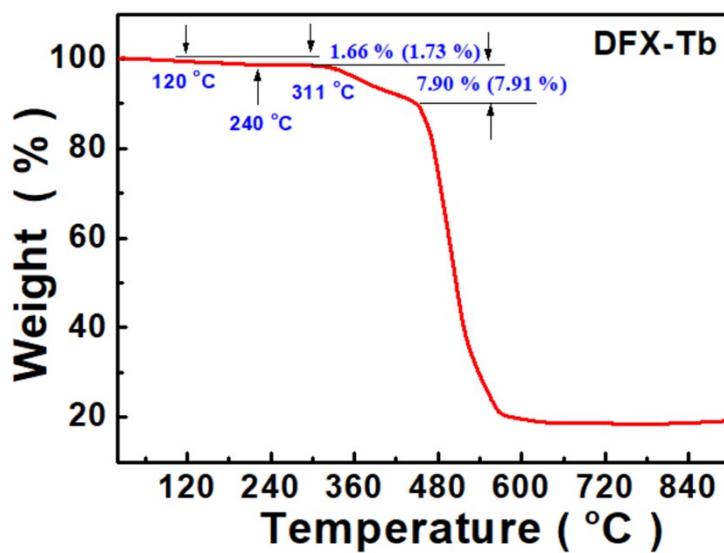

Figure S10. TG curve of compound **DFX-Tb**.

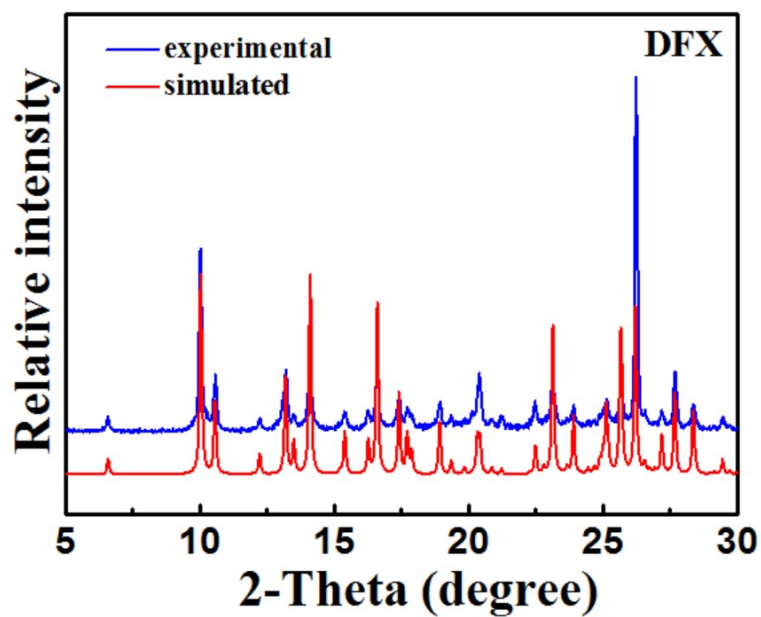

Figure S11. The experimental and simulated PXR D patterns for **DFX**. The top is the experimental pattern, and the bottom is the simulated one.

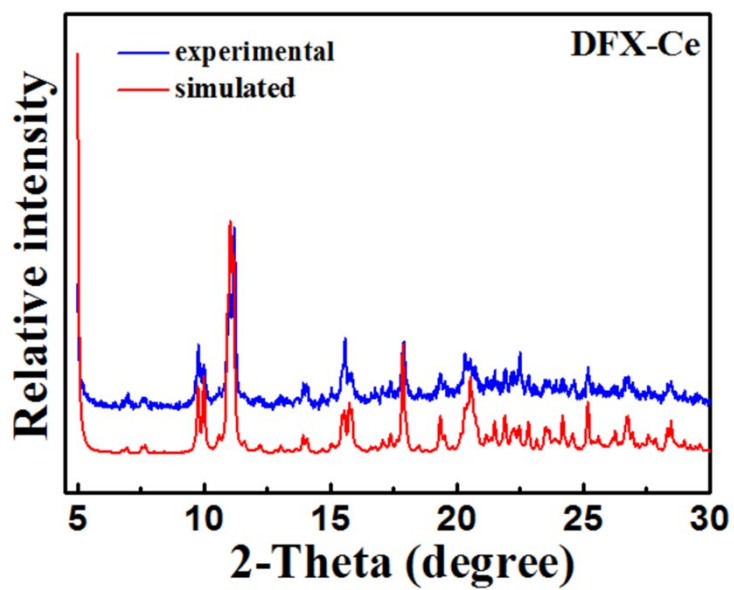

Figure S12. The experimental and simulated PXR D patterns for **DFX-Ce**. The top is the experimental pattern, and the bottom is the simulated one.



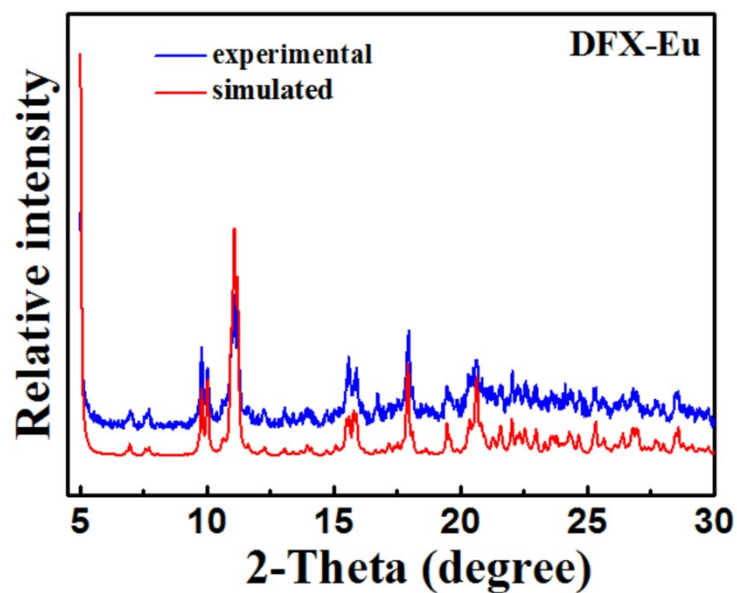

Figure S13. The experimental and simulated PXR D patterns for **DFX-Eu**. The top is the experimental pattern, and the bottom is the simulated one.

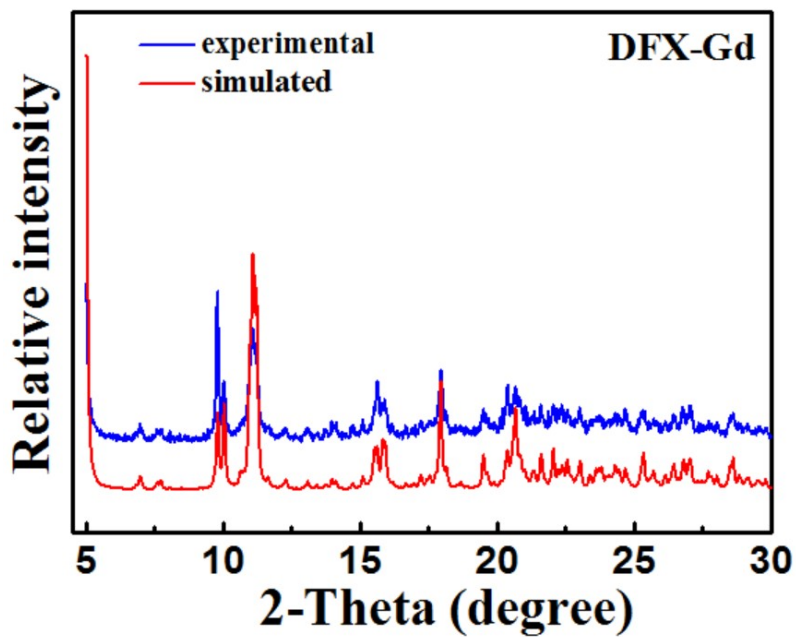

Figure S14. The experimental and simulated PXR D patterns for **DFX-Gd**. The top is the experimental pattern, and the bottom is the simulated one.

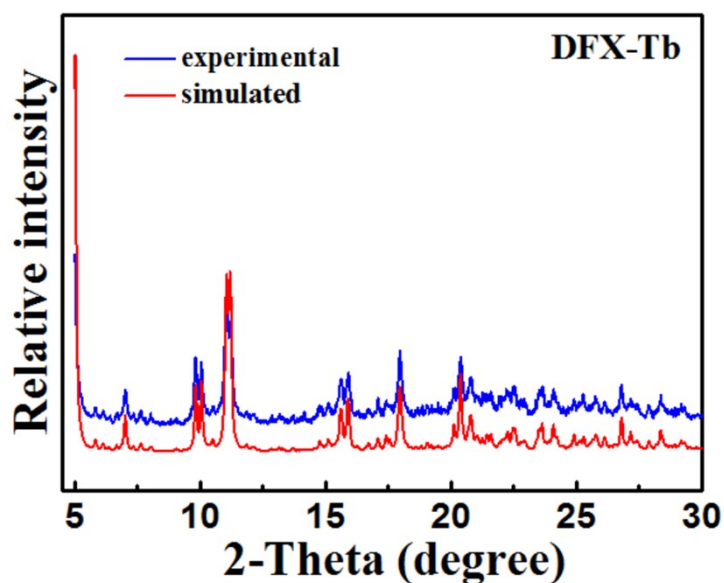

Figure S15. The experimental and simulated PXRD patterns for **DFX-Tb**. The top is the experimental pattern, and the bottom is the simulated one.

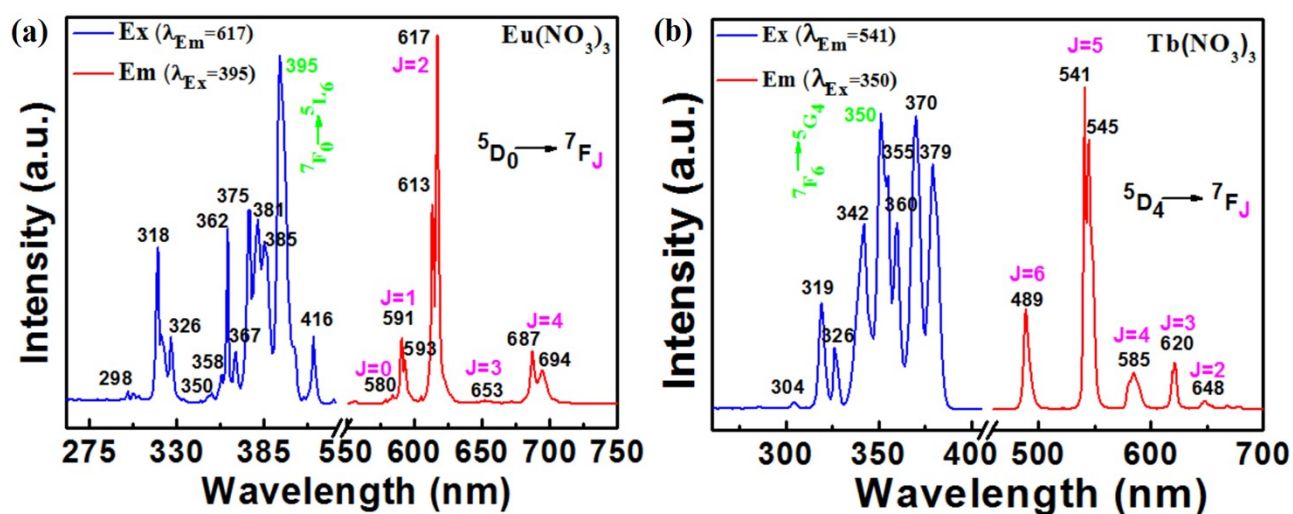

Figure S16. (a) The excitation (left,  $\lambda_{em} = 617$  nm) and emission (right,  $\lambda_{ex} = 395$  nm) spectra for  $\text{Eu}(\text{NO}_3)_3 \cdot 6\text{H}_2\text{O}$  ; (b) The excitation (left,  $\lambda_{em} = 514$  nm) and emission (right,  $\lambda_{ex} = 350$  nm) spectra for  $\text{Tb}(\text{NO}_3)_3 \cdot 6\text{H}_2\text{O}$ .

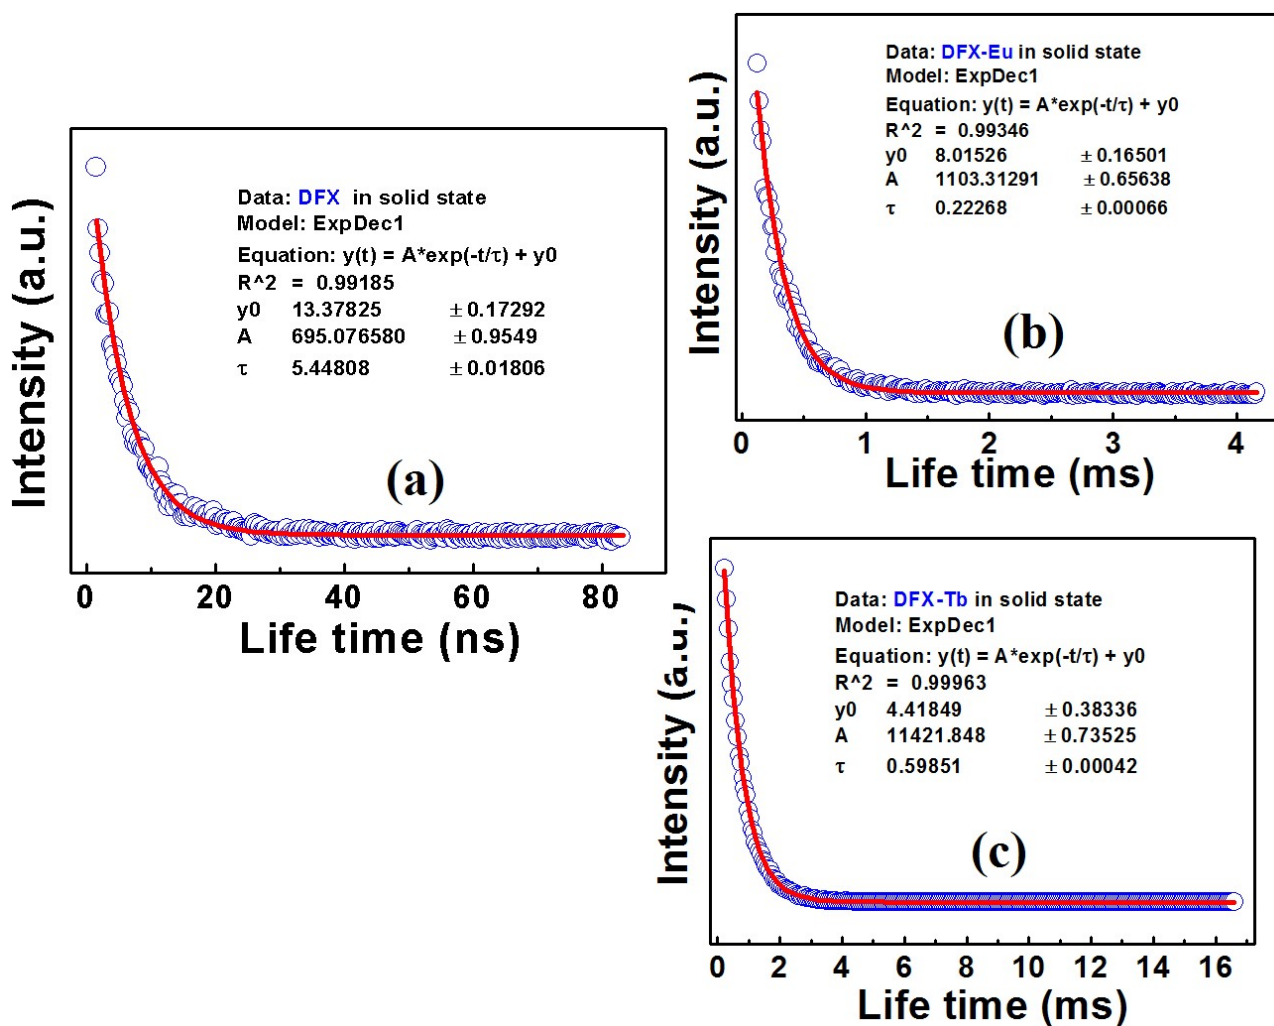

Figure S17. Emission decay curves by monitoring the transitions (a)  $\pi^* \rightarrow \pi$  (588 nm) of the intraligand for **DFX**, (b)  ${}^5D_0 \rightarrow {}^7F_2$  (616 nm) of the  $\text{Eu}^{3+}$  ion for **DFX-Eu** and (c)  ${}^5D_4 \rightarrow {}^7F_5$  (540 nm) of the  $\text{Tb}^{3+}$  ion for **DFX-Tb**. The excitations were done at 343, 394 and 356 nm for the ligand,  $\text{Eu}^{3+}$  and  $\text{Tb}^{3+}$  ion. [O: experimental data; —: fitted according to equation  $y(t) = A \exp(-t/\tau) + y_0$ ].

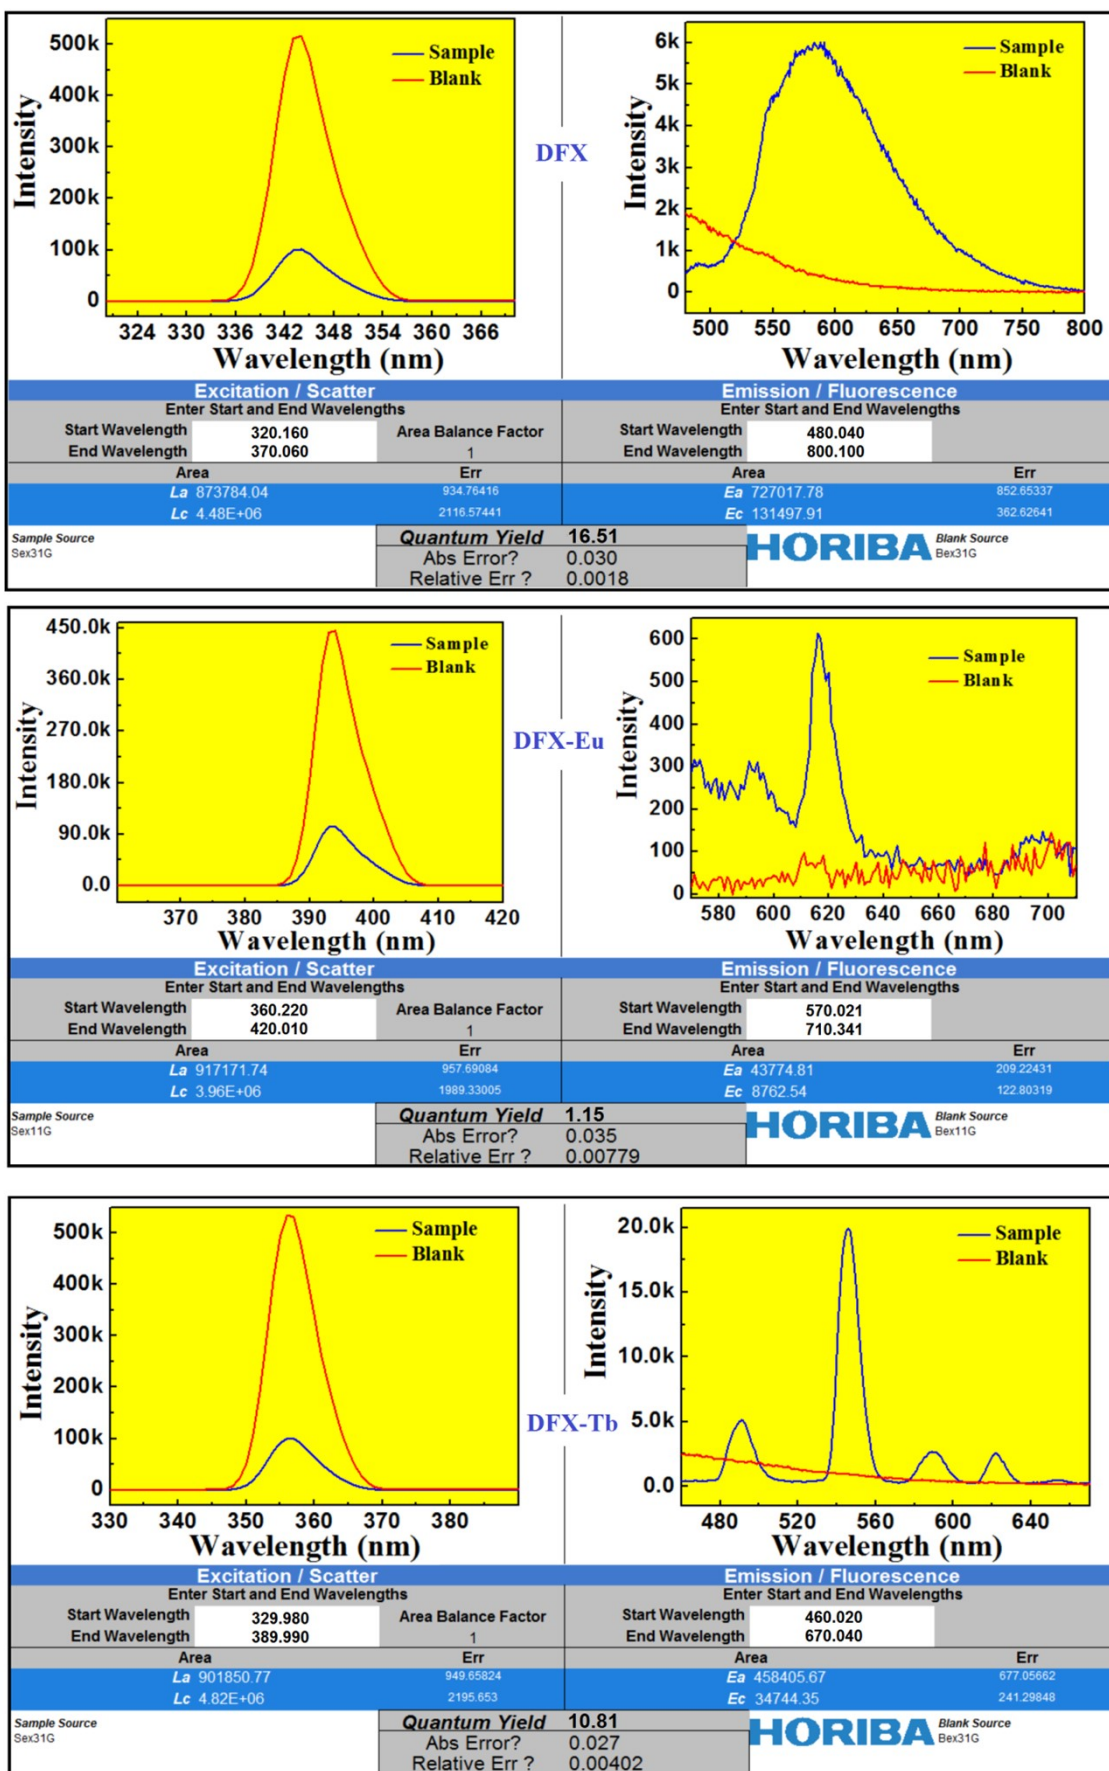

Figure S18. The measurement details of solid state fluorescence quantum yield for **DFX** (top), **DFX-Eu** (middle) and **DFX-Tb** (down).
